# Supplementary material
Source: publisher figshare collection journal article supplement (https://frontiersin.figshare.com/ndownloader/files/22691339)
Supplement: Supplementary file [file 22691339]

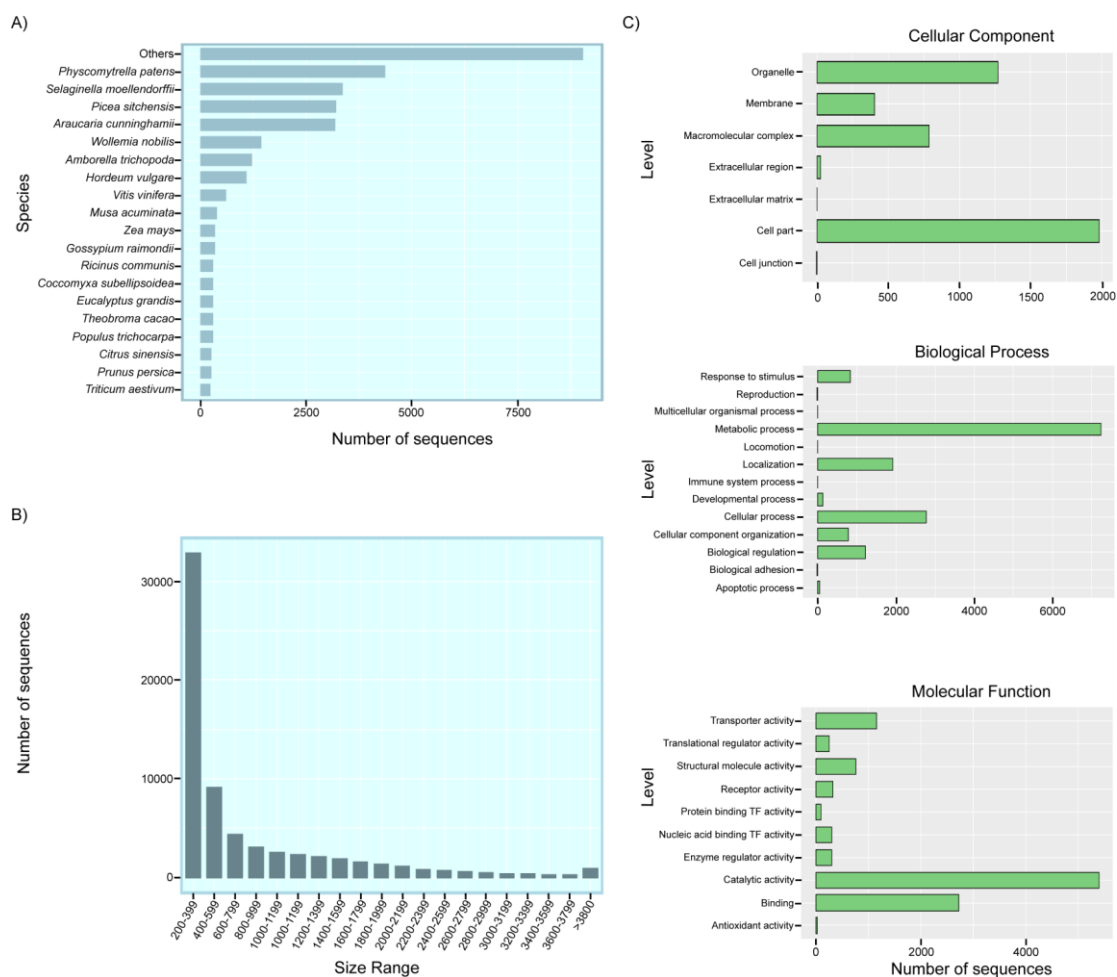

Figure S2. (A) Top-hit species distribution of the final transcriptome of *H. cruentum* showing abundance of top hits to sequences of Bryophyta, Lycophyta, and Pinophyta. (B) Transcript size distribution showing high proportion of small transcripts in the final transcriptome assembly. (C) GO-category distribution of *H. cruentum* transcripts among level 2 GO categories: Cellular component (CC), biological process (BP) and molecular function (MF). Values indicated on X axis are not in the same scale.
